# Supplementary material for: Mild Therapeutic Hypothermia Alleviated Myocardial Ischemia/Reperfusion Injury via Targeting SLC25A10 to Suppress Mitochondrial Apoptosis
Source: Springer Nature journal article supplement (doi:10.1007/s12265-024-10503-z), 2024-04-03
Supplement: MOESM1 [file 26938902]

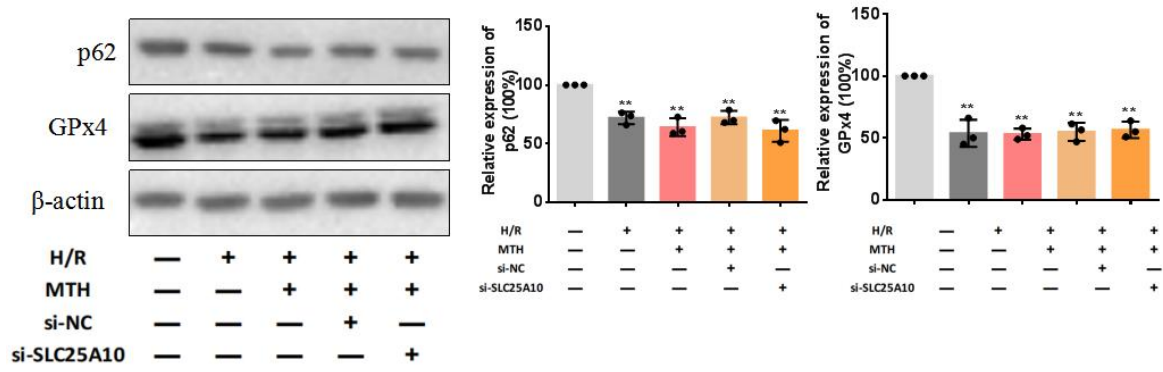

Fig. S1 Effects of MTH treatment or SLC25A10 knockdown on ferroptosis and autophagy. The markers, such as p62 and GPx4, were determined and analyzed by western blot. Data shown are means  $\pm$  SD, n=3. \*\*P < 0.01 compared with Ctrl group.

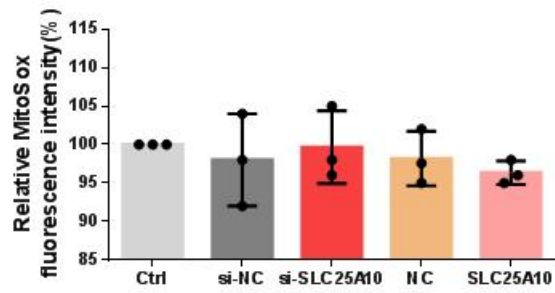

Fig. S2 Effects of SLC25A10 expressions on mitochondrial status in cardiomyocytes were determined by MitoSox staining.
