# Supplementary material for: Mild Therapeutic Hypothermia Alleviated Myocardial Ischemia/Reperfusion Injury via Targeting SLC25A10 to Suppress Mitochondrial Apoptosis
Source: Springer Nature journal article supplement (doi:10.1007/s12265-024-10503-z), 2024-04-03
Supplement: MOESM2 [file 26938902]

**Table S1. Differentiated expression proteins in sham group compared with I/R group**

| PG.ProteinGroups | PG.Genes    | PG.ProteinDescriptions                                                                                  |
|------------------|-------------|---------------------------------------------------------------------------------------------------------|
| P49301;Q5BKA0    | Clec10a     | C-type lectin domain family 10 member A<br>TBC1 domain family, member 4;TBC1 domain family,             |
| D3Z881;D3ZGN0    | Tbc1d4      | member 4                                                                                                |
| Q6KC51           | Ablim2      | Actin-binding LIM protein 2                                                                             |
| F1LMV6           | Dsp         | Desmoplakin                                                                                             |
| A0A0G2JVV5       | Huwe1       | E3 ubiquitin-protein ligase HUWE1                                                                       |
| A0A0G2JZI2       | Eprs        | Glutamyl-prolyl-tRNA synthetase                                                                         |
| O89035           | Slc25a10    | Mitochondrial dicarboxylate carrier                                                                     |
| D3ZF12           | Spes3       | Signal peptidase complex subunit 3                                                                      |
| D3ZWS0;G3V6R     |             | Scribbled planar cell polarity protein;Leucine-rich                                                     |
| 4                | Scrib;Lrrc1 | repeat-containing 1                                                                                     |
| A0A0G2JY08;D3    |             |                                                                                                         |
| ZFD0             | Myo18a      | Myosin XVIIIa                                                                                           |
| D3ZPF0           | Fhl3        | Four and a half LIM domains 3                                                                           |
| B2RYI2           | Srp68       | Signal recognition particle subunit SRP68                                                               |
| A0A0G2JT45;Q5    |             |                                                                                                         |
| XIJ7             | Cab39l      | Calcium-binding protein 39-like                                                                         |
| D3ZAS9           | Ddrgk1      | DDRKG domain-containing 1                                                                               |
| Q6MGB8           | RT1-A2      | RT1 class I, A2<br>Transport and golgi organization 2 homolog;Similar to                                |
| A0A0G2JXP4;D3    |             | Ser/Thr-rich protein T10 in DGCR region (Predicted),                                                    |
| ZY86             | Tango2      | isoform CRA_a                                                                                           |
| D3ZHY9           | Rasal1      | RAS protein activator like 1 (GAP1 like) (Predicted)                                                    |
| A0A140TAE6;Q9    |             | Enoyl-[acyl-carrier-protein] reductase,                                                                 |
| Z311             | Mecr        | mitochondrial                                                                                           |
| Q64350           | Eif2b5      | Translation initiation factor eIF-2B subunit epsilon<br>Mitochondrial import inner membrane translocase |
| O35092           | Timm17a     | subunit Tim17-A                                                                                         |
| Q7TP77           | Mrpl49      | Aa2-277                                                                                                 |
| P52944           | Pdlim1      | PDZ and LIM domain protein 1                                                                            |
| Q6AYI1           | Ddx5        | DEAD (Asp-Glu-Ala-Asp) box polypeptide 5<br>Protein phosphatase 1K (PP2C domain containing)             |
| D4A7X5           | Ppm1k       | (Predicted)                                                                                             |
| F1LVF4           | Cox10       | Protoheme IX farnesyltransferase, mitochondrial<br>NADH dehydrogenase (ubiquinone) complex I,           |
| A0A0H2UI06;D3    |             | assembly factor 6;NADH dehydrogenase (ubiquinone)                                                       |
| ZN43             | Ndufaf6     | complex I, assembly factor 6                                                                            |
| E9PU29           | Rnf31       | Ring finger protein 31                                                                                  |
| F1LML7           | Hip1r       | Huntingtin-interacting protein 1-related                                                                |
| A0A0G2K3P9;Q6    | Syng1       | Synaptogyrin-1 (Fragment);Synaptogyrin-1                                                                |

|               |         |                                                    |
|---------------|---------|----------------------------------------------------|
| 2876          |         |                                                    |
| D4A720        | Srsf7   | RCG61762, isoform CRA_d                            |
| D3ZER6        | Tnpo2   | Transportin 2                                      |
| B0BNJ9        | Tmem14c | RCG44002, isoform CRA_a                            |
| Q5XIN4        | Mtmt9   | Myotubularin-related protein 9                     |
| P24268;Q6P6T6 | Ctsd    | Cathepsin D                                        |
| Q5BJX0        | Ntmt1   | N-terminal Xaa-Pro-Lys N-methyltransferase 1       |
| P47860        | Pfkl    | ATP-dependent 6-phosphofructokinase, platelet type |
| D3ZS75        | Ndufc1  | NADH:ubiquinone oxidoreductase subunit C1          |
| A0A0G2K876;F8 |         | Phosphodiesterase;Phosphodiesterase;cGMP-dependent |
| WFW5;Q01062   | Pde2a   | 3',5'-cyclic phosphodiesterase                     |
| D4ACR1        |         | Uncharacterized protein                            |

**Table S2. Differentiated expression proteins in MTH+I/R group compared with I/R group**

| PG.ProteinGroups                | PG.Genes | PG.ProteinDescriptions                                                                         |
|---------------------------------|----------|------------------------------------------------------------------------------------------------|
| D3Z8I7                          | Gstt3    | Glutathione S-transferase, theta 3                                                             |
| D3ZZL5                          | Gpihbp1  | Glycosylphosphatidylinositol-anchored high density lipoprotein-binding protein 1               |
| A0A0G2K7C6;P35815;Q642F2;Q99ND8 | Ppm1b    | Protein phosphatase 1B;Protein phosphatase 1B;Ppm1b protein;Ppm1b protein                      |
| Q6AY80                          | Nqo2     | Ribosyl-dihydroxynicotinamide dehydrogenase [quinone]                                          |
| G3V940                          | Coro1b   | Coronin                                                                                        |
| Q5FVQ9                          | Tbce     | Tubulin-specific chaperone E                                                                   |
| B2RYW8                          | Minos1   | MICOS complex subunit Mic10                                                                    |
| F1LML7                          | Hip1r    | Huntingtin-interacting protein 1-related                                                       |
| Q6Q7Y5                          | Gna13    | Guanine nucleotide-binding protein subunit alpha-13                                            |
| B1H248;P0C0A2                   | Vps36    | Vacuolar protein-sorting-associated protein 36                                                 |
| P52944                          | Pdlim1   | PDZ and LIM domain protein 1                                                                   |
| A0A0G2K0B4;A0A0G2K8P3           | Nedd4    | E3 ubiquitin-protein ligase<br>Mitochondrial import inner membrane translocase subunit Tim17-A |
| O35092                          | Timm17a  | subunit Tim17-A                                                                                |
| Q9Z2Q7                          | Stx8     | Syntaxin-8                                                                                     |
| Q9JI04                          | Col5a3   | Alpha 4 type V collagen                                                                        |
| D3ZRM0                          | Dusp27   | Dual-specificity phosphatase 27, atypical                                                      |
| A0A0G2JU49;B0BN02               | Mtx1     | Metaxin 1                                                                                      |
| O89035                          | Slc25a10 | Mitochondrial dicarboxylate carrier                                                            |
| Q63610                          | Tpm3     | Tropomyosin alpha-3 chain                                                                      |
| P30835                          | Pfkl     | ATP-dependent 6-phosphofructokinase, liver type                                                |
| A0A0A0MXU2;A0A0G2K9F9;O3        | Coro7    | Coronin;Coronin;Coronin-7                                                                      |
